# Supplementary material for: Elementary steps in electrical doping of organic semiconductors
Source: PubMed Central journal article supplement (PMC5862893; doi:10.1038/s41467-018-03302-z), 2018-03-21
Supplement: 41467_2018_3302_MOESM2_ESM.pdf [file 41467_2018_3302_MOESM2_ESM.pdf]

## Description of Additional Supplementary File

File Name: Supplementary Movie 1

Description: **Monte Carlo transport simulations on ZnPc:F<sub>6</sub>-TCNNQ**: Illustration of the simulated occupation probability  $W$  of sites with charge carriers (holes) in a  $21 \times 21 \times 21$  mesh with periodic boundary conditions and  $MR=10^{-3}$  (10 dopants, without traps). Blue and orange dots represent the occupation probabilities of nearest neighbor (nn) and next nearest-neighbor (nn+1) sites of dopants, respectively, which positions are marked as red circles. For all other sites, the occupation probability is indicated by green dots. The occupation probability  $W$  increases with the plotted dot size each, here shown for a threshold of  $W > 10^{-4}$ .
